# Supplementary material
Source: MDPI journal article supplement (https://www.mdpi.com/2073-4352/11/5/510)
Supplement: s1 [file s1 › crystals-1195207-supplementary.pdf]

# **Influence of doping on the transport properties of $\text{Y}_{1-x}\text{Ln}_x\text{MnO}_{3+\delta}$ (Ln: Pr, Nd)**

**Kacper Cichy<sup>1</sup> and Konrad Świerczek<sup>1,2,\*</sup>**

<sup>1</sup> AGH University of Science and Technology, Faculty of Energy and Fuels, Department of Hydrogen Energy  
al. A. Mickiewicza 30, 30-059 Krakow, Poland

<sup>2</sup> AGH Centre of Energy, AGH University of Science and Technology  
ul. Czarnowiejska 36, 30-054 Krakow, Poland

\* Correspondence: xi@agh.edu.pl

## **SUPPLEMENTARY MATERIAL**

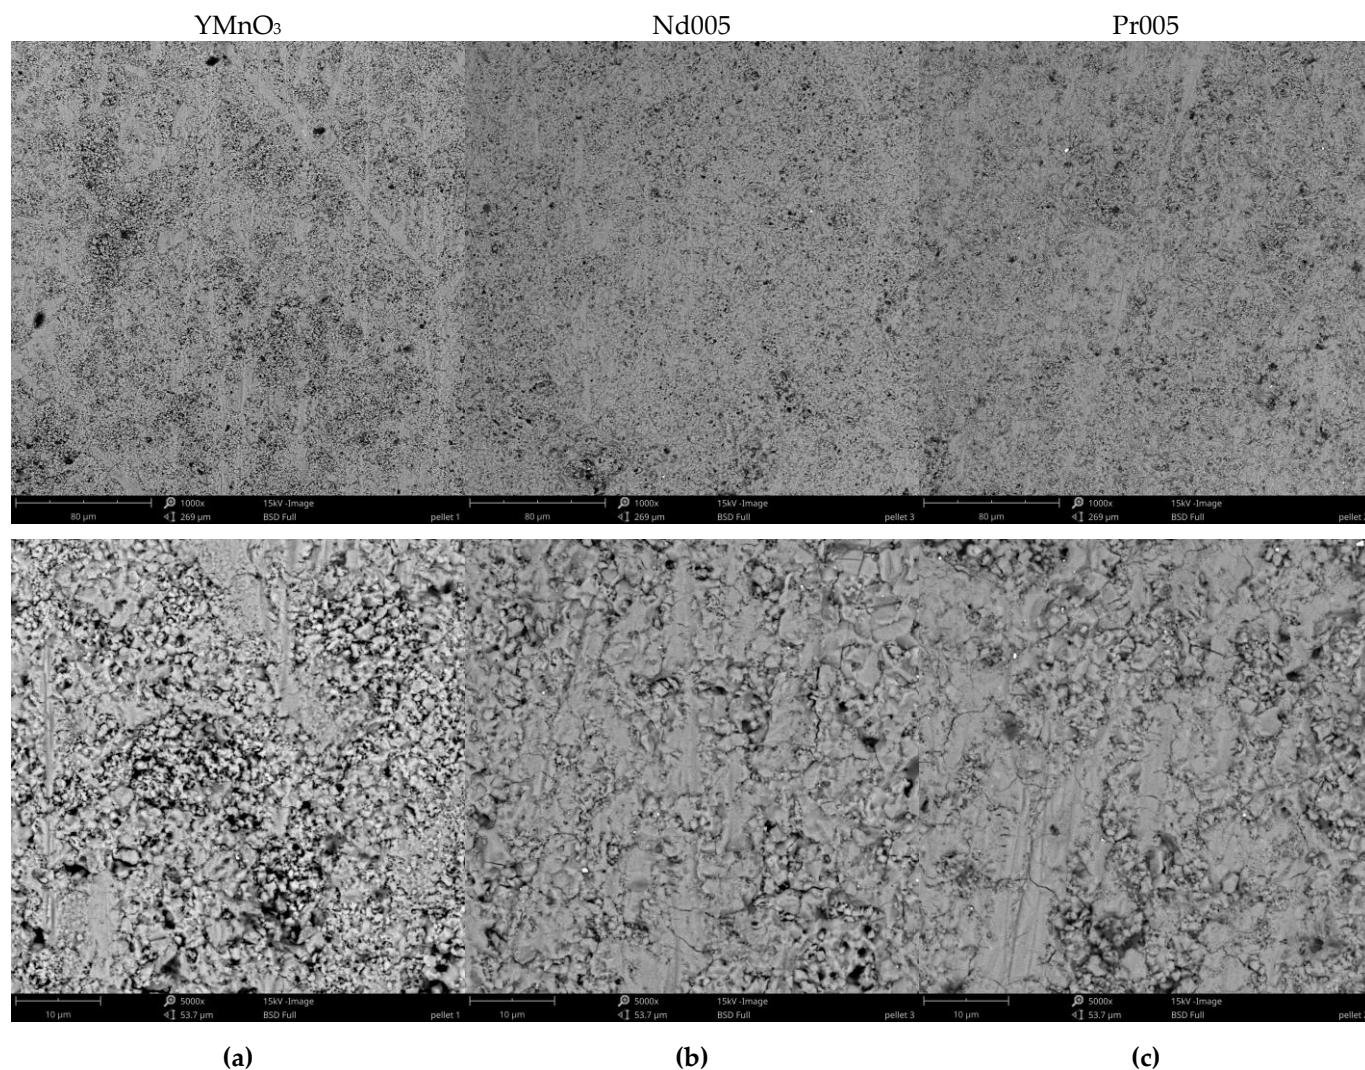

**Figure S1.** SEM images of the a) YMnO<sub>3</sub>, b) Nd005 and c) Pr005 pellets reduced at 1000 °C in argon, after electrical conductivity measurements. Magnifications are: 1000x (top) and 5000x (bottom). Significant porosity can be clearly seen for all three samples. Furthermore, numerous cracks can be seen on the surface of Nd005 and Pr005 samples, which is not that significant in YMnO<sub>3</sub>. This is probably caused by high chemical expansion during oxygen incorporation and extraction into/from materials. As the amount of oxygen incorporated in Nd005 and Pr005 is higher (compared to YMnO<sub>3+δ</sub>), chemical expansion is also greater and leads to intensified cracking.

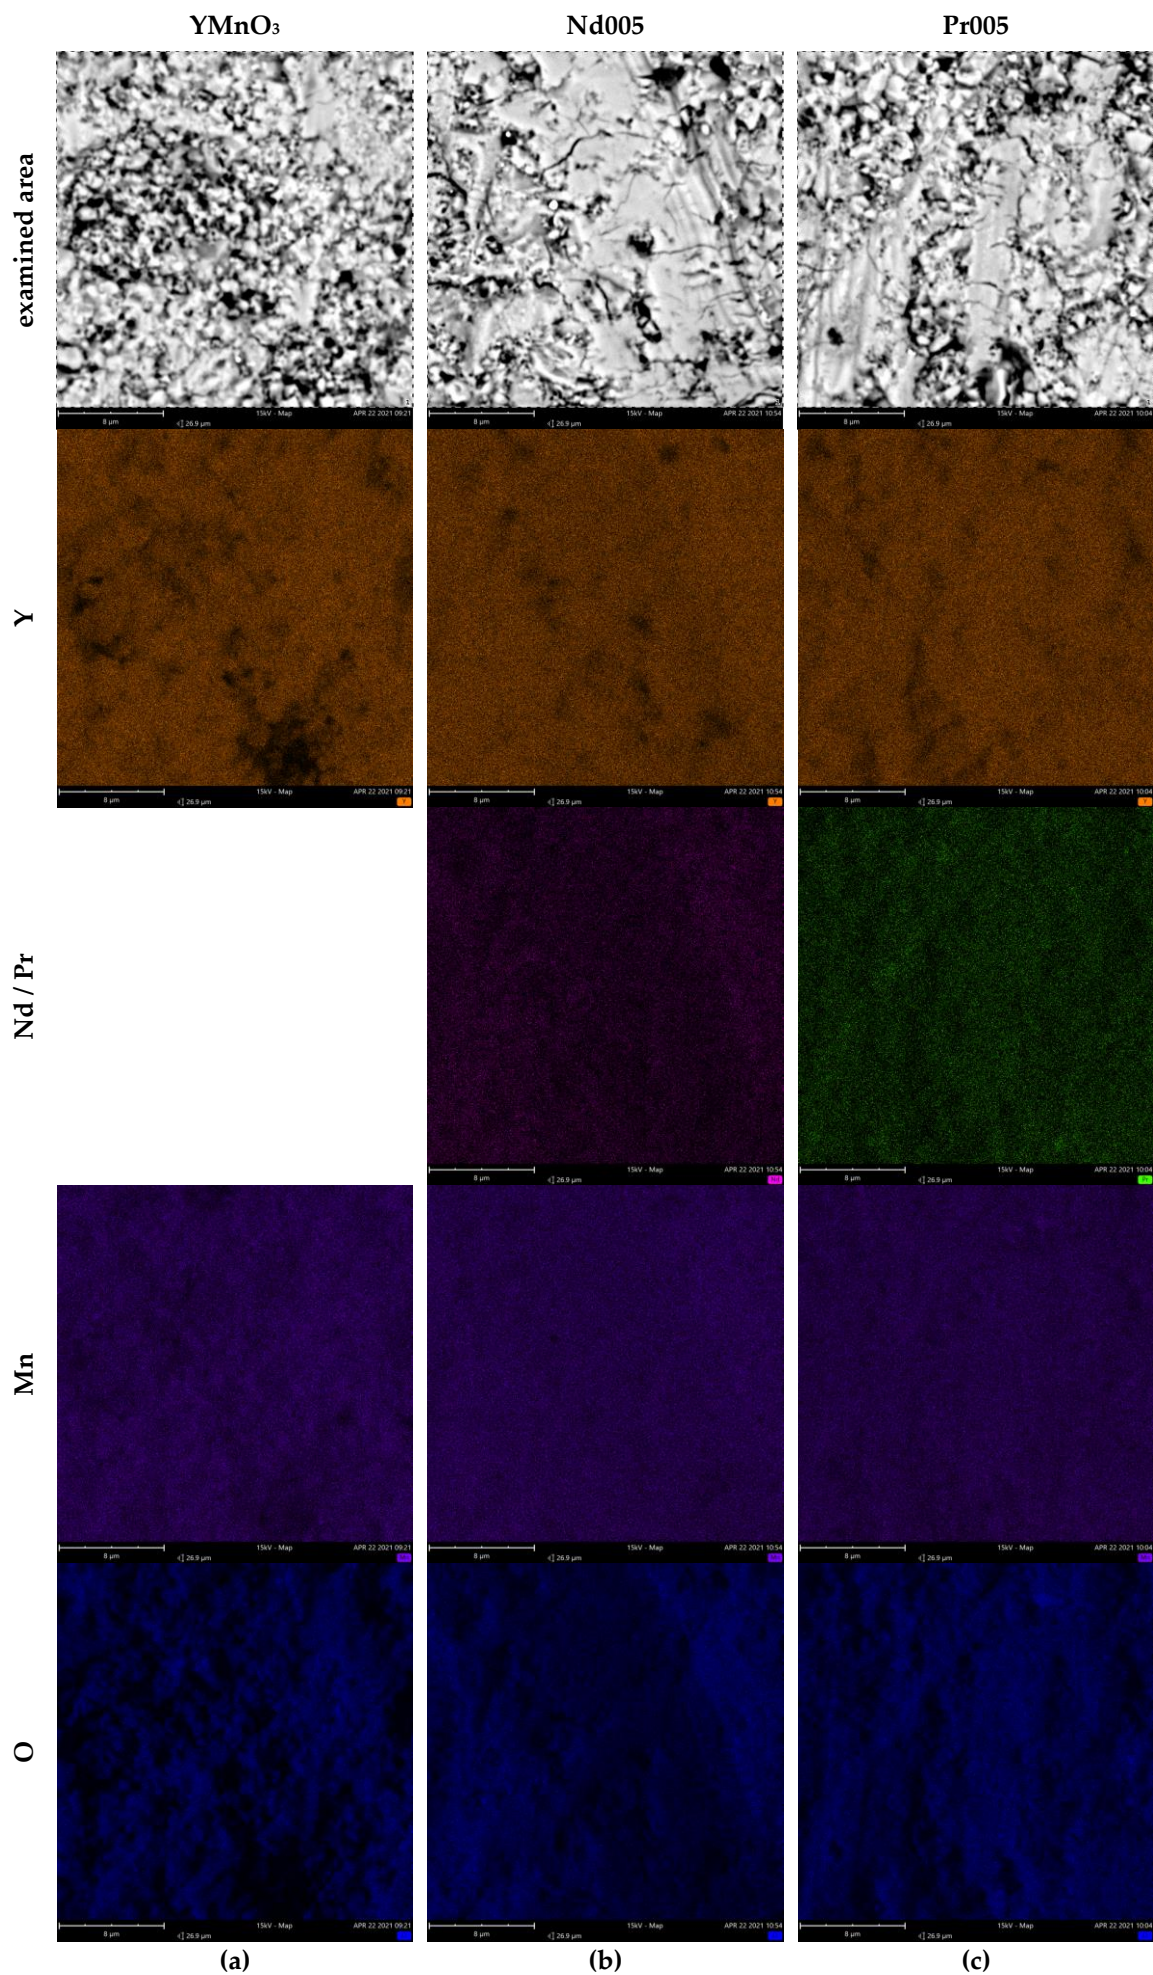

**Figure S2.** EDS elemental maps of the a) YMnO<sub>3</sub>, b) Nd005 and c) Pr005 pellets reduced in Ar after electrical conductivity measurements.

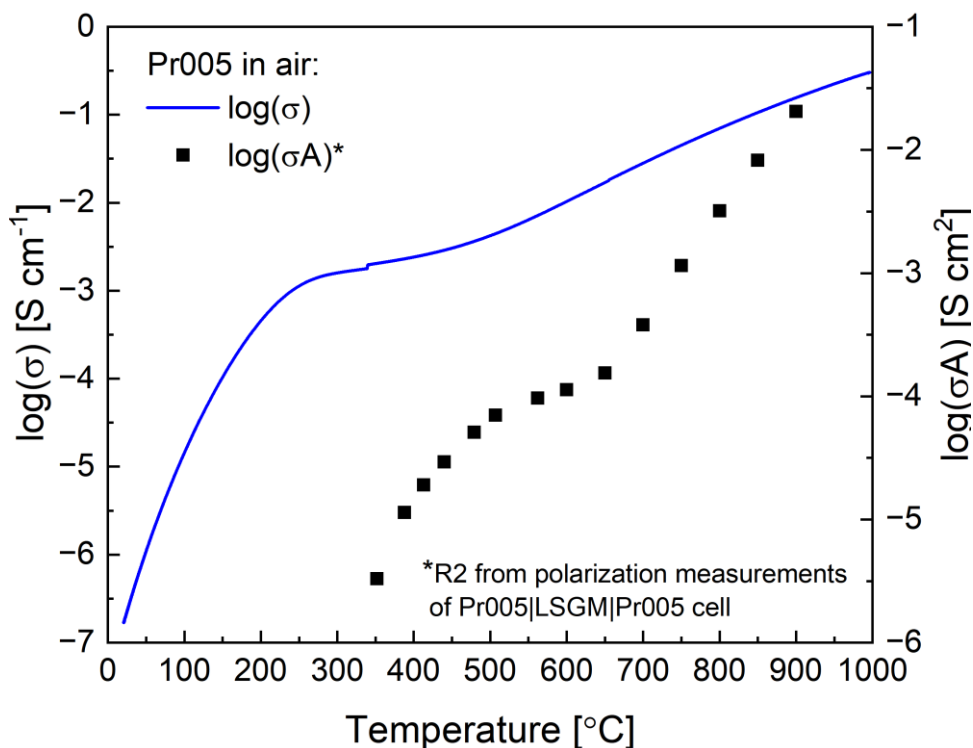

**Figure S3.** Comparison of conductivity and oxygen content dependencies on temperature, depicted in linear temperature scale.

**Table S1.** Fitted values of the equivalent circuit elements of the Pr005|LSGM|Pr005 cell. Thickness of LSGM electrolyte: 1.46 mm. Effective surface area of single Pr005 electrode: 27.3 mm<sup>2</sup>.

| Temperature<br>[°C] | R1<br>[Ω] | R2a<br>[Ω] | CPE2a-T<br>[S s <sup>p</sup> ] | CPE2a-P<br>[-] | R2<br>[Ω] | CPE2-T<br>[S s <sup>p</sup> ] | CPE2-P<br>[-] |
|---------------------|-----------|------------|--------------------------------|----------------|-----------|-------------------------------|---------------|
| 900                 | 3.52      | -          | -                              | -              | 13.78     | 1.11E-02                      | 0.519         |
| 850                 | 4.41      | -          | -                              | -              | 34.39     | 1.09E-02                      | 0.501         |
| 800                 | 5.62      | -          | -                              | -              | 88.48     | 1.01E-02                      | 0.493         |
| 750                 | 7.31      | -          | -                              | -              | 245.8     | 8.79E-03                      | 0.496         |
| 700                 | 9.83      | -          | -                              | -              | 742.7     | 7.30E-03                      | 0.507         |
| 650                 | 14.05     | -          | -                              | -              | 1827      | 5.71E-03                      | 0.528         |
| 600                 | 21.55     | -          | -                              | -              | 2502      | 4.21E-03                      | 0.558         |
| 562                 | 32.33     | -          | -                              | -              | 2930      | 2.96E-03                      | 0.593         |
| 507                 | 69.77     | -          | -                              | -              | 4028      | 1.73E-03                      | 0.642         |
| 479                 | 112.3     | -          | -                              | -              | 5551      | 1.32E-03                      | 0.664         |
| 440                 | 244.9     | 18.48      | 3.28E-07                       | 0.922          | 9656      | 8.84E-04                      | 0.693         |
| 413                 | 428.3     | 69.19      | 1.11E-07                       | 0.875          | 14891     | 6.86E-04                      | 0.708         |
| 388                 | 719.0     | 271.0      | 3.02E-08                       | 0.848          | 24772     | 5.37E-04                      | 0.719         |
| 352                 | 1235      | 1727       | 2.95E-09                       | 0.888          | *         | *                             | *             |
| 328                 | 1564      | 4545       | 9.08E-10                       | 0.933          | *         | *                             | *             |
| 308                 | 1812      | 10722      | 4.76E-10                       | 0.957          | *         | *                             | *             |
| 287                 | 1997      | 23721      | 3.26E-10                       | 0.972          | *         | *                             | *             |
| 259                 | 2124      | 75046      | 2.54E-10                       | 0.981          | *         | *                             | *             |

\* for the lowest temperatures, error values significantly exceeded 10%, so these were not taken for interpretation of the experiment
